# Supplementary material for: Trazodone changed the polysomnographic sleep architecture in insomnia disorder: a systematic review and meta-analysis
Source: PubMed Central journal article supplement (PMC9402537; doi:10.1038/s41598-022-18776-7), 2022-08-24
Supplement: 41598_2022_18776_MOESM2_ESM.pdf [file 41598_2022_18776_MOESM2_ESM.pdf]

PUBMED search strategy

| No. | Query                                                                                                                                                                                                                                                                                                                                                                                                                                                                                                                                                                                                                                                                                                                                                                                                                                                                                                                                                                                                                                                                                                                                                             |
|-----|-------------------------------------------------------------------------------------------------------------------------------------------------------------------------------------------------------------------------------------------------------------------------------------------------------------------------------------------------------------------------------------------------------------------------------------------------------------------------------------------------------------------------------------------------------------------------------------------------------------------------------------------------------------------------------------------------------------------------------------------------------------------------------------------------------------------------------------------------------------------------------------------------------------------------------------------------------------------------------------------------------------------------------------------------------------------------------------------------------------------------------------------------------------------|
| #1  | "Trazodone"[Mesh]                                                                                                                                                                                                                                                                                                                                                                                                                                                                                                                                                                                                                                                                                                                                                                                                                                                                                                                                                                                                                                                                                                                                                 |
| #2  | <p>((((((((((((((((((((((((((((Tradozone[Title/Abstract]) OR<br/> (AF-1161[Title/Abstract])) OR (AF 1161[Title/Abstract])) OR<br/> (AF1161[Title/Abstract])) OR (Deprax[Title/Abstract])) OR<br/> (Deprax[Title/Abstract])) OR (Gen-Trazodone[Title/Abstract]))<br/> OR (Gen Trazodone[Title/Abstract])) OR<br/> (Molipaxin[Title/Abstract])) OR<br/> (Novo-Trazodone[Title/Abstract])) OR (Novo<br/> Trazodone[Title/Abstract])) OR (Trittico[Title/Abstract])) OR<br/> (PMS-Trazodone[Title/Abstract])) OR (PMS<br/> Trazodone[Title/Abstract])) OR<br/> (Ratio-Trazodone[Title/Abstract])) OR (Ratio<br/> Trazodone[Title/Abstract])) OR (Ratio<br/> Trazodone[Title/Abstract])) OR (Thombran[Title/Abstract]))<br/> OR (Trazodon Hexal[Title/Abstract])) OR<br/> (Trazodon-Neuraxpharm[Title/Abstract])) OR (Trazodon<br/> Neuraxpharm[Title/Abstract])) OR<br/> (TrazodonNeuraxpharm[Title/Abstract])) OR (Trazodone<br/> Hydrochloride[Title/Abstract])) OR (Trazon[Title/Abstract]))<br/> OR (Apo-Trazodone[Title/Abstract])) OR (Apo<br/> Trazodone[Title/Abstract])) OR<br/> (Nu-Trazodone[Title/Abstract])) OR (Nu<br/> Trazodone[Title/Abstract]))</p> |
| #3  | "Sleep Initiation and Maintenance Disorders"[Mesh]                                                                                                                                                                                                                                                                                                                                                                                                                                                                                                                                                                                                                                                                                                                                                                                                                                                                                                                                                                                                                                                                                                                |
| #4  | <p>((((((((((((((((((((((((((((Insomnia[Title/Abstract]) OR (Disorders of<br/> Initiating and Maintaining Sleep[Title/Abstract])) OR (DIMS<br/> [Title/Abstract])) OR (Early Awakening[Title/Abstract])) OR<br/> (Awakening, Early[Title/Abstract])) OR (Nonorganic<br/> Insomnia[Title/Abstract])) OR (Insomnia,<br/> Nonorganic[Title/Abstract])) OR (Primary<br/> Insomnia[Title/Abstract])) OR (Insomnia,<br/> Primary[Title/Abstract])) OR (Transient<br/> Insomnia[Title/Abstract])) OR (Insomnia,<br/> Transient[Title/Abstract])) OR (Rebound<br/> Insomnia[Title/Abstract])) OR (Insomnia,<br/> Rebound[Title/Abstract])) OR (Secondary</p>                                                                                                                                                                                                                                                                                                                                                                                                                                                                                                              |

Insomnia[Title/Abstract])) OR (Insomnia,  
Secondary[Title/Abstract])) OR (Sleep Initiation  
Dysfunction[Title/Abstract])) OR (Dysfunction, Sleep  
Initiation[Title/Abstract])) OR (Dysfunctions, Sleep  
Initiation[Title/Abstract])) OR (Sleep Initiation  
Dysfunctions[Title/Abstract])) OR  
(Sleeplessness[Title/Abstract])) OR (Insomnia  
Disorder[Title/Abstract])) OR (Insomnia  
Disorders[Title/Abstract])) OR (Insomnias[Title/Abstract])) OR  
(Chronic Insomnia[Title/Abstract])) OR (Insomnia,  
Chronic[Title/Abstract])) OR (Psychophysiological  
Insomnia[Title/Abstract])) OR (Insomnia,  
Psychophysiological[Title/Abstract]))

|    |           |
|----|-----------|
| #5 | #1 OR #2  |
| #6 | #3 OR #4  |
| #7 | #5 AND #6 |

---

Article title: Trazodone Changed the Polysomnographic Sleep Architecture in  
Insomnia: A Systematic Review and Meta-Analysis

journal name: Drugs

author names: Yongliang Zheng<sup>1</sup> • Tian Lv<sup>2</sup> • Jingjing Wu<sup>3</sup> • Yumeng Lyu<sup>1</sup>

Affiliation:

- <sup>1</sup> School of Rehabilitation Medicine, Jiangsu Vocational College of Medicine, Yancheng, China
- <sup>2</sup> Department of Neurology, Zhuji Hospital Affiliated Shaoxing University, Shaoxing, China
- <sup>3</sup> Department of Cardiology, Pudong New Area People's Hospital, Shanghai, China

The corresponding author and e-mail address:

Yongliang Zheng, 12131@jsmc.edu.cn
