# Supplementary material for: Trazodone changed the polysomnographic sleep architecture in insomnia disorder: a systematic review and meta-analysis
Source: PubMed Central journal article supplement (PMC9402537; doi:10.1038/s41598-022-18776-7), 2022-08-24
Supplement: 41598_2022_18776_MOESM3_ESM.pdf [file 41598_2022_18776_MOESM3_ESM.pdf]

## Forests plots and funnel plots for all parameters

Fig. 1 pooled effects of trazodone on TST

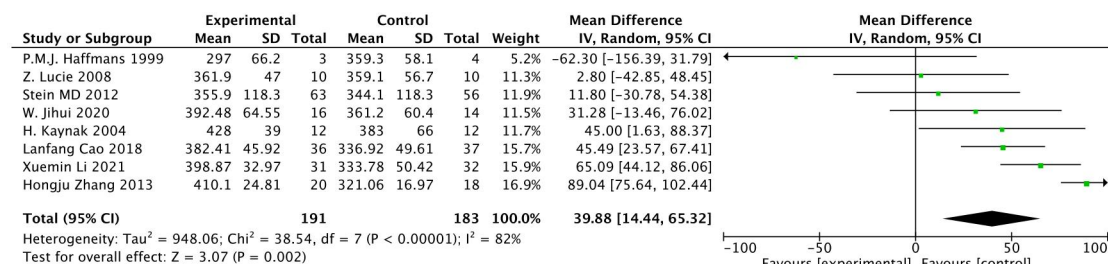

Fig. 2 subgroups analysis to TST (treatment duration)

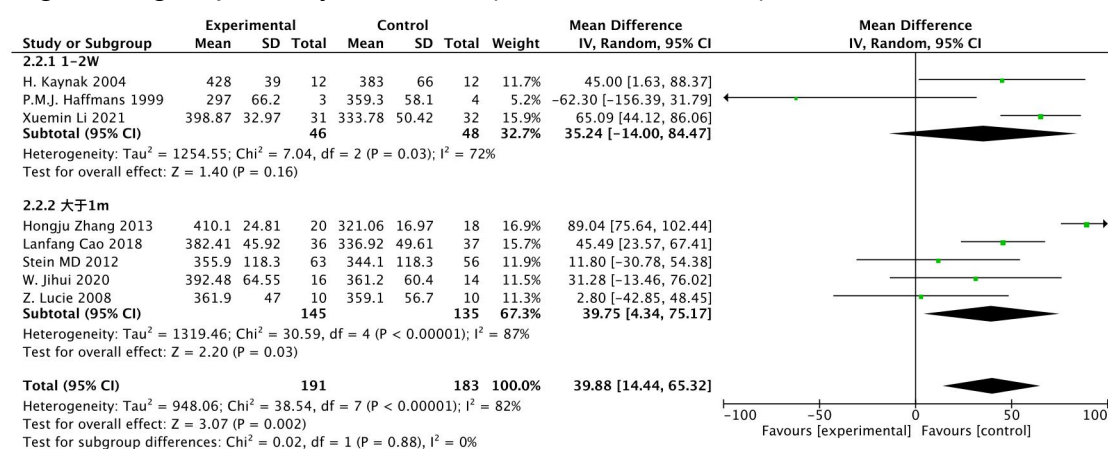

Fig. 3 subgroups analysis to TST ( mean age)

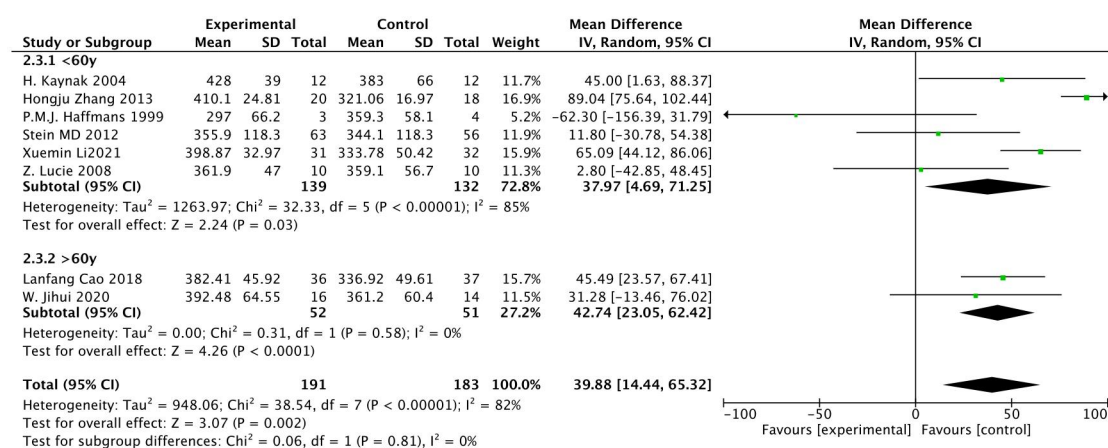

Fig. 4 subgroups analysis to TST(dosage)

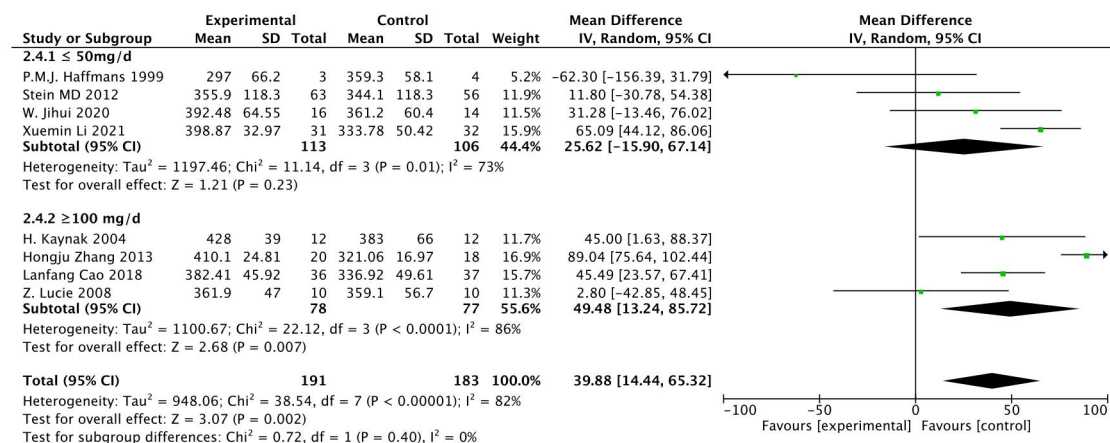

Fig. 5 subgroups analysis to TST(treatment combination or placebo)

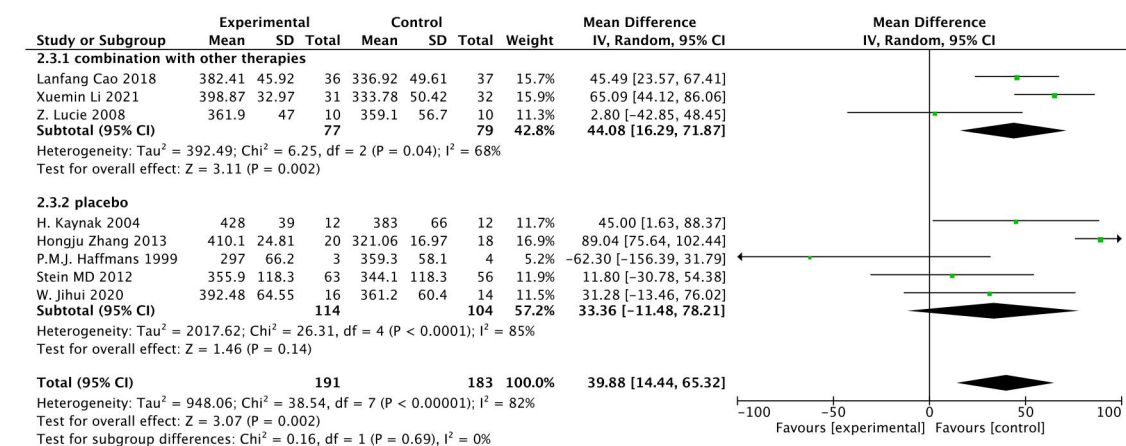

Fig. 6 Funnel plot for TST

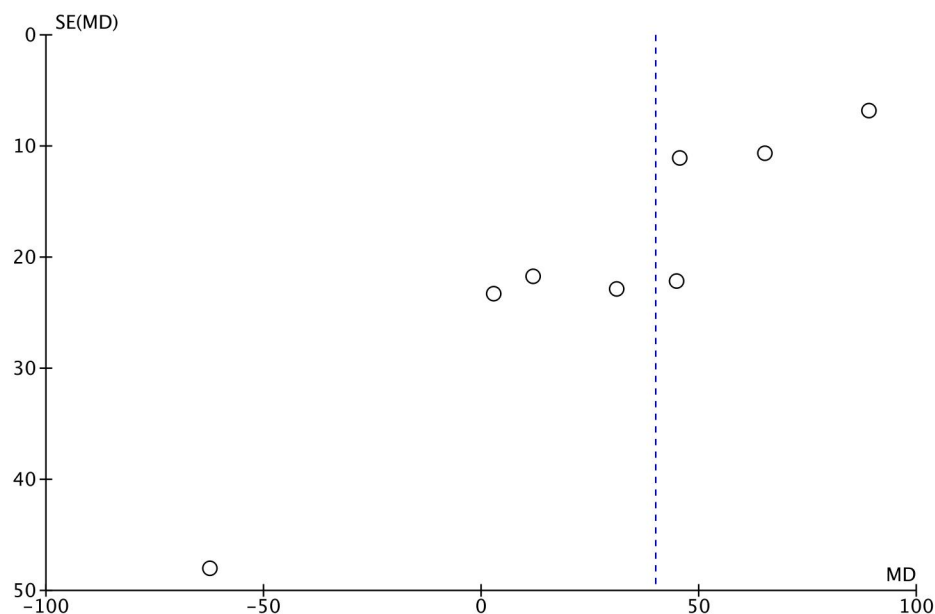

Fig. 7 pooled effects of trazodone on LPS

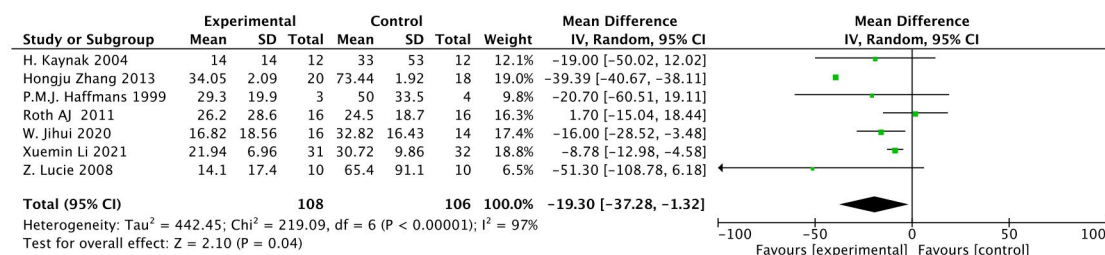

Fig. 8 Sensitivity analysis to LPS

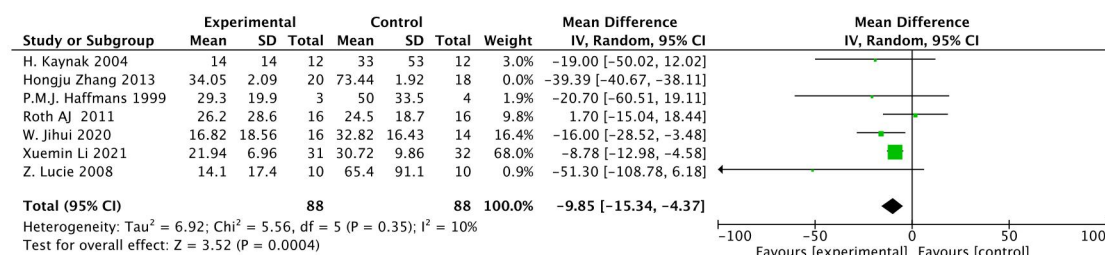

Fig. 9 subgroups analysis to LPS(dosage)

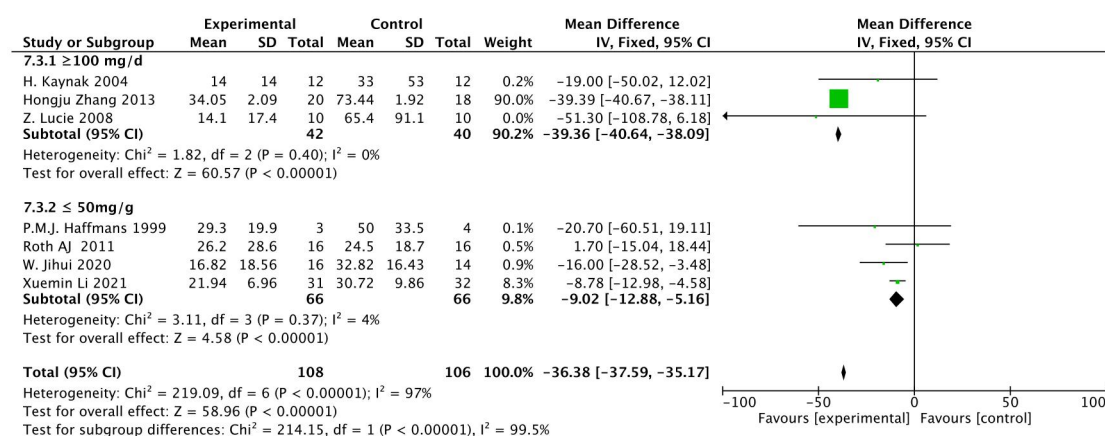

Fig. 10 subgroups analysis to LPS (treatment duration)

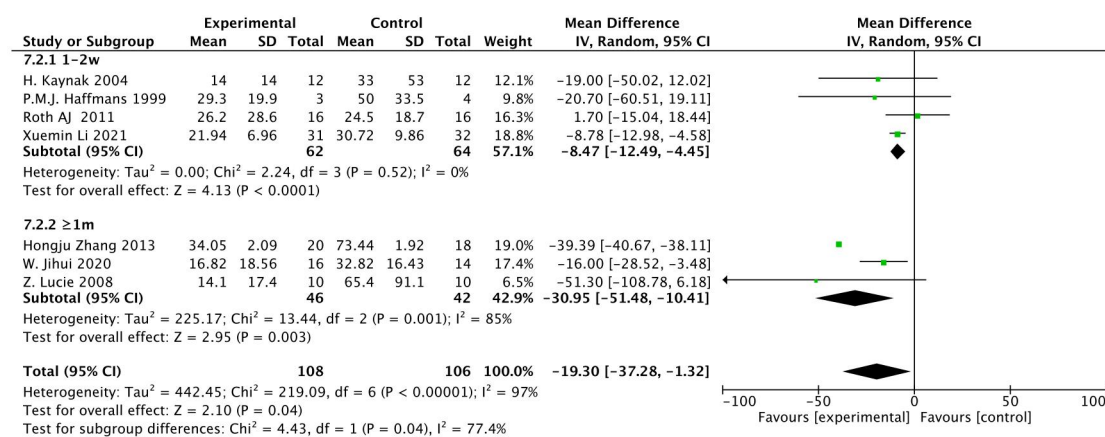

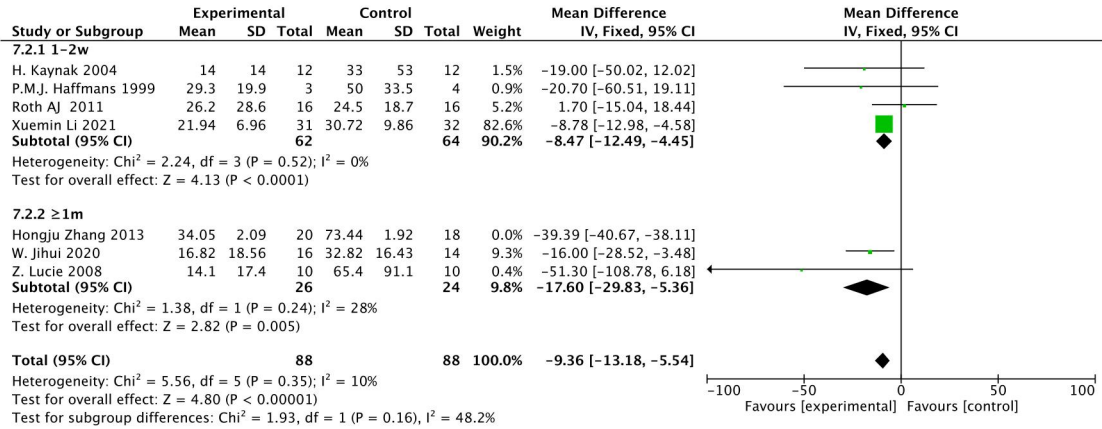

Fig. 11 subgroups analysis to LPS(combination with other therapies or placebo)

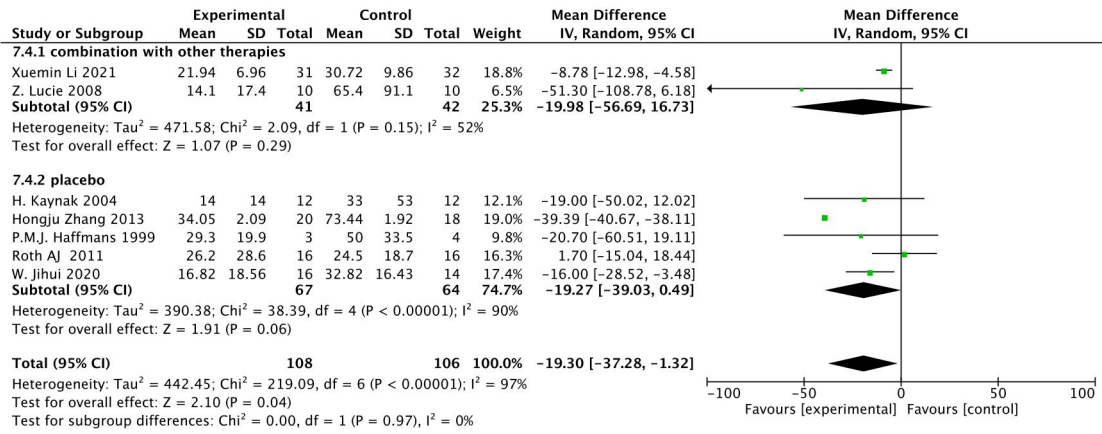

Fig. 12 Funnel plot for LPS

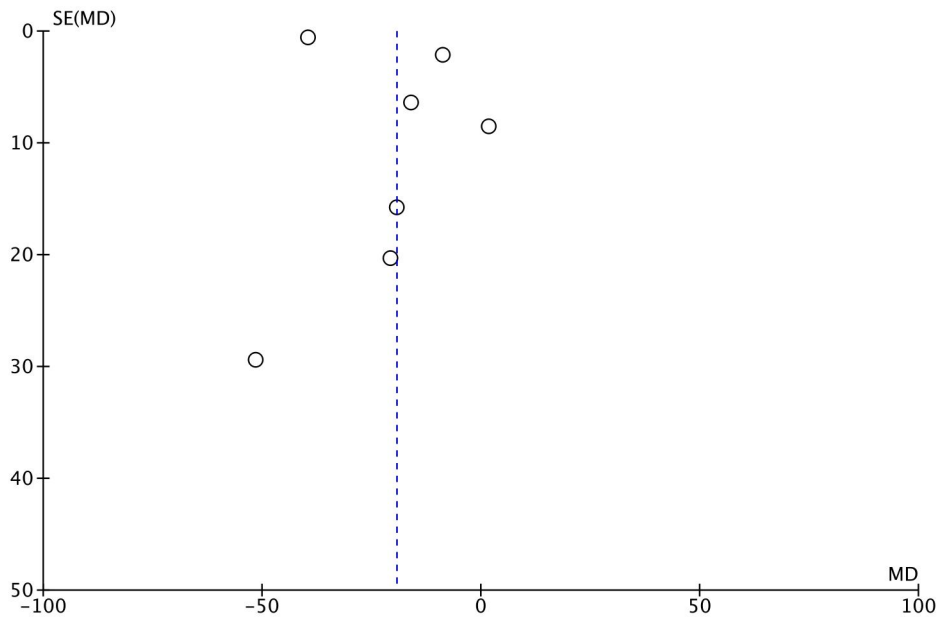

Fig. 13 pooled effects of trazodone on SE

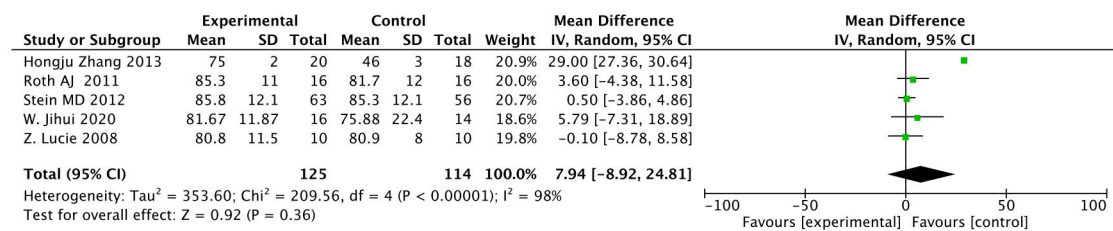

Fig. 14 Sensitivity analysis to SE

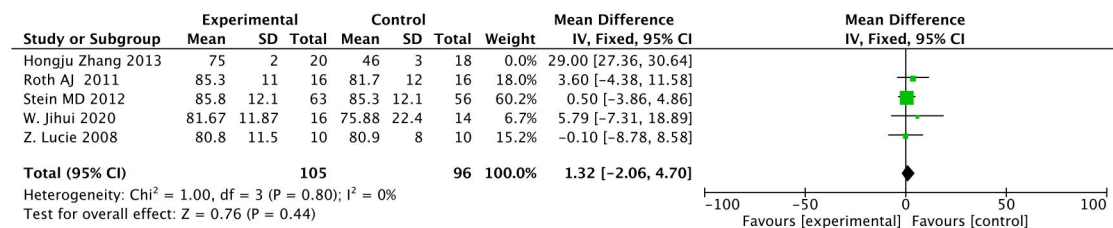

Fig. 15 Funnel plot for SE

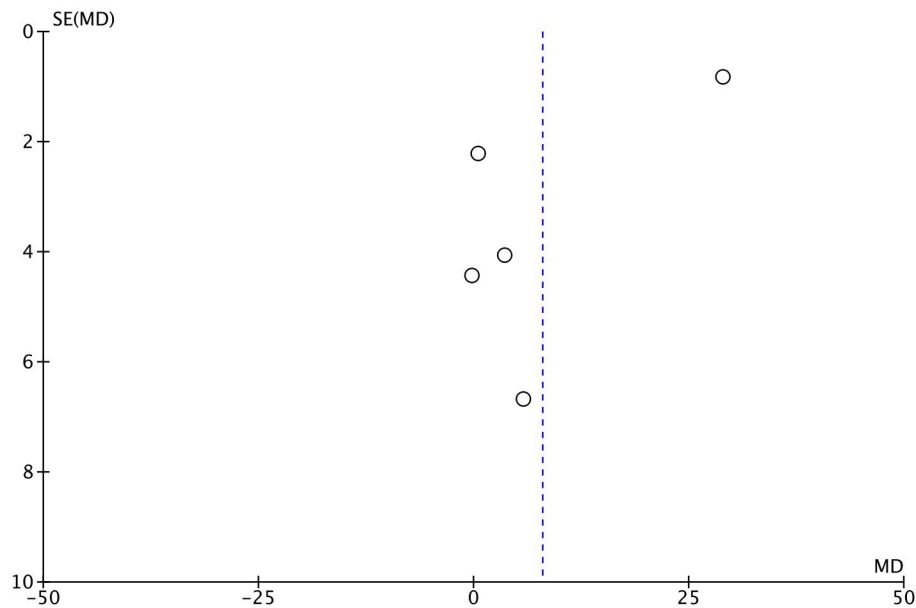

Fig. 16 pooled effects of trazodone on WASO

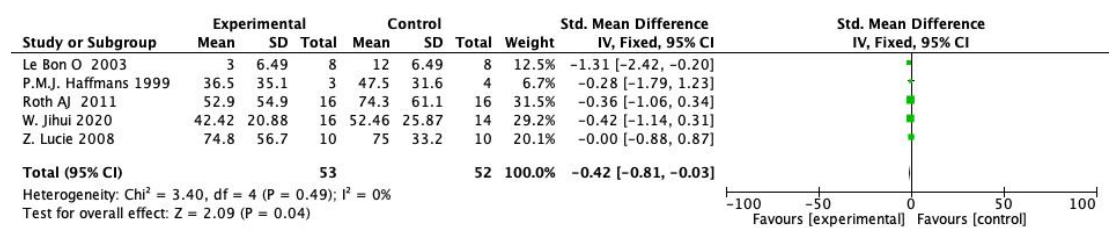

Fig. 17 Sensitivity analysis of WASO to combination of treatment

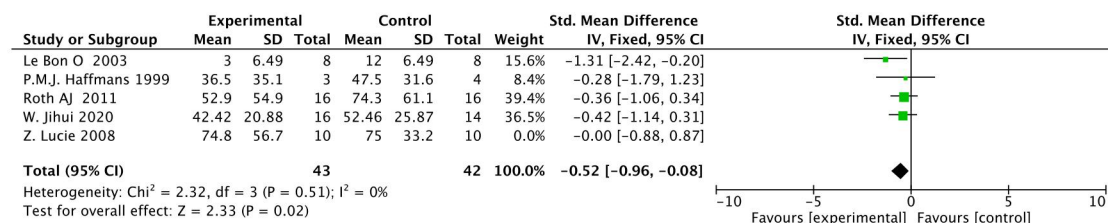

Fig. 18 Funnel plot for WASO

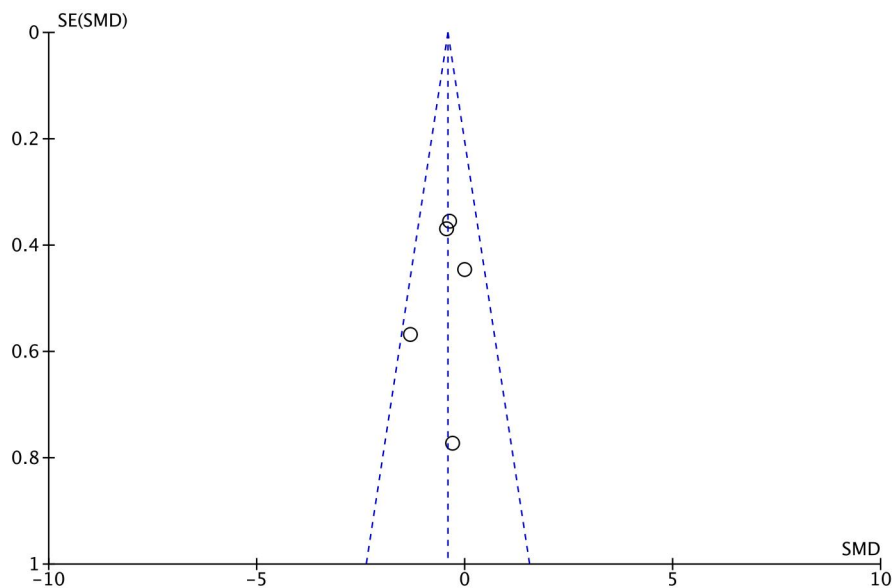

Fig. 19 pooled effects of trazodone on NAs (including both arousal times and arousal index)

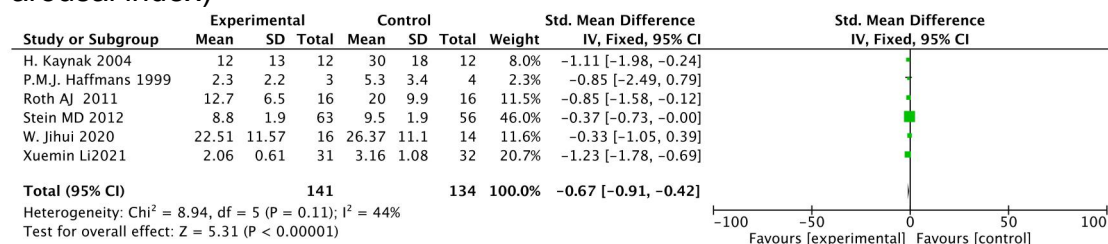

Fig. 20 Sensitivity analysis of NAs to combination of treatment

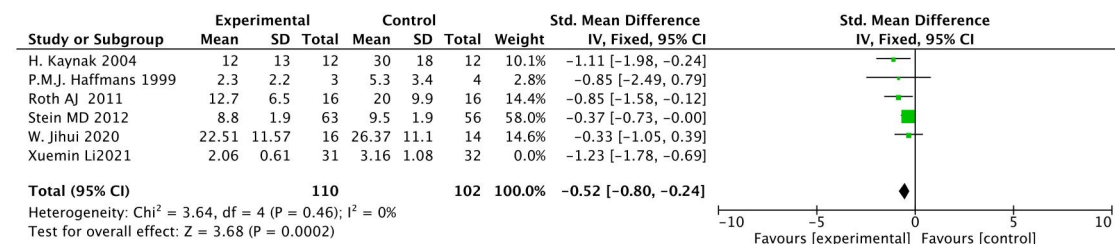

Fig. 21 Funnel plot for NAs

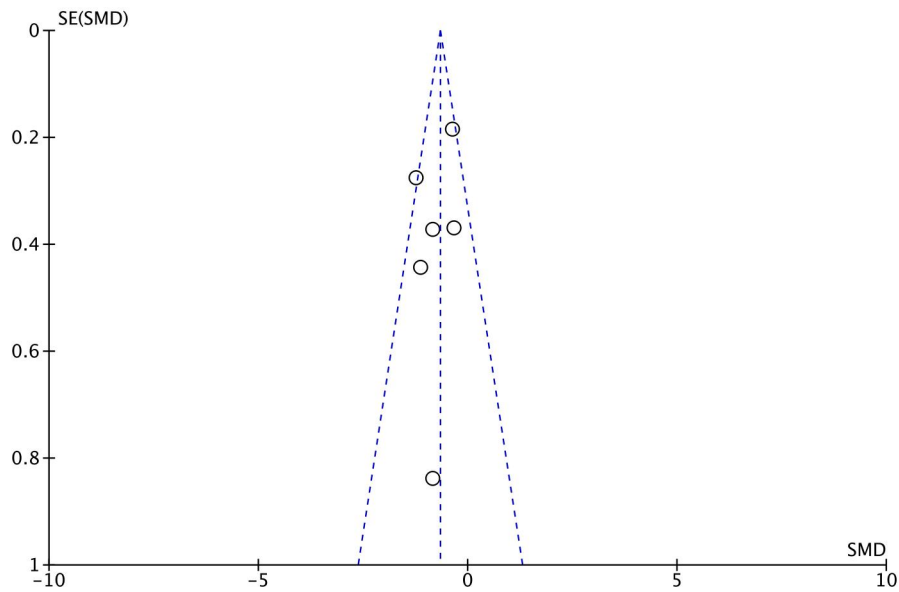

Fig. 22 pooled effects of trazodone on AHI

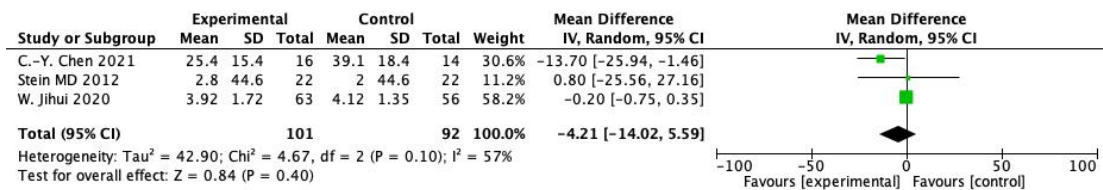

Fig. 23 pooled effects of trazodone on REML

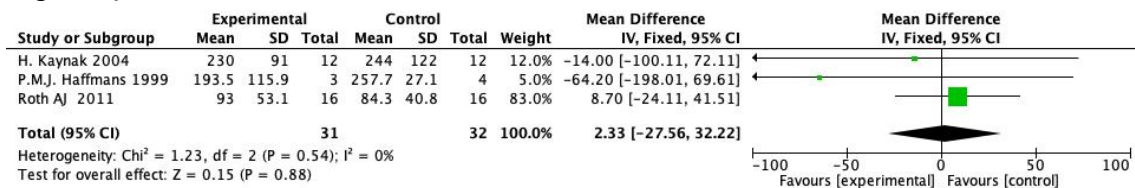

Fig. 24 pooled effects of trazodone on REM

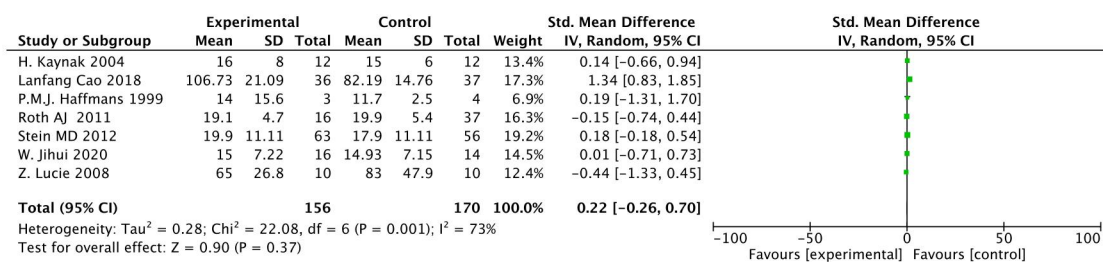

Fig. 25 Sensitivity analysis to REM

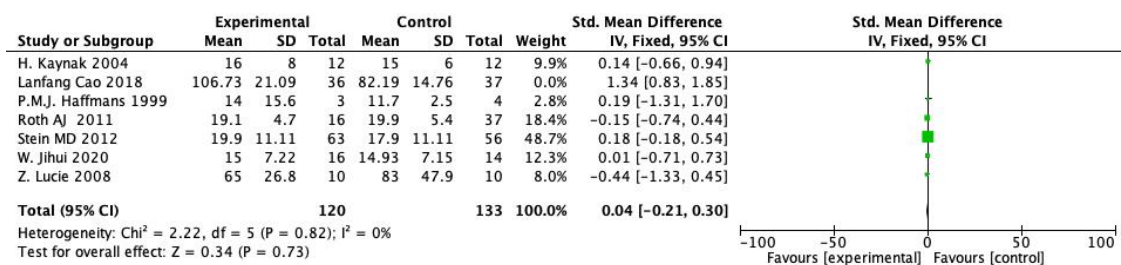

Fig. 26 subgroups analysis to REM (treatment duration)

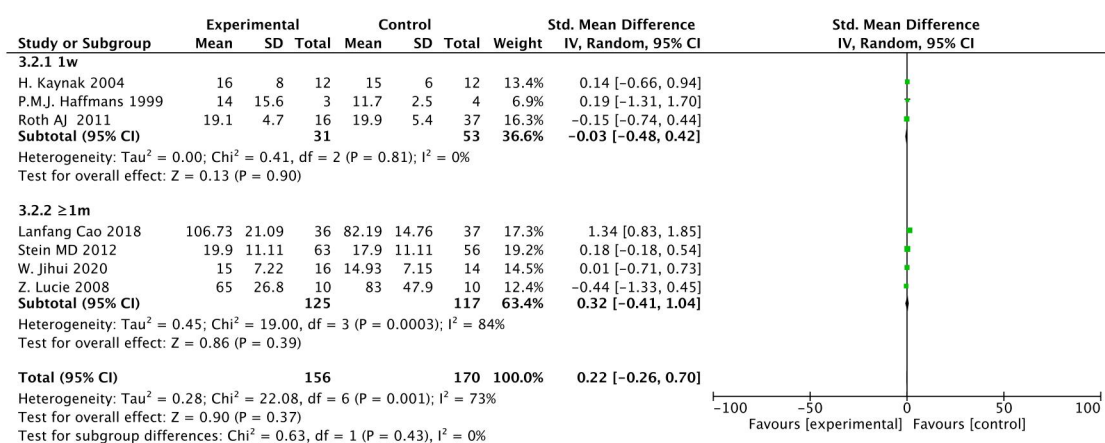

Fig. 27 subgroups analysis to REM(dosage)

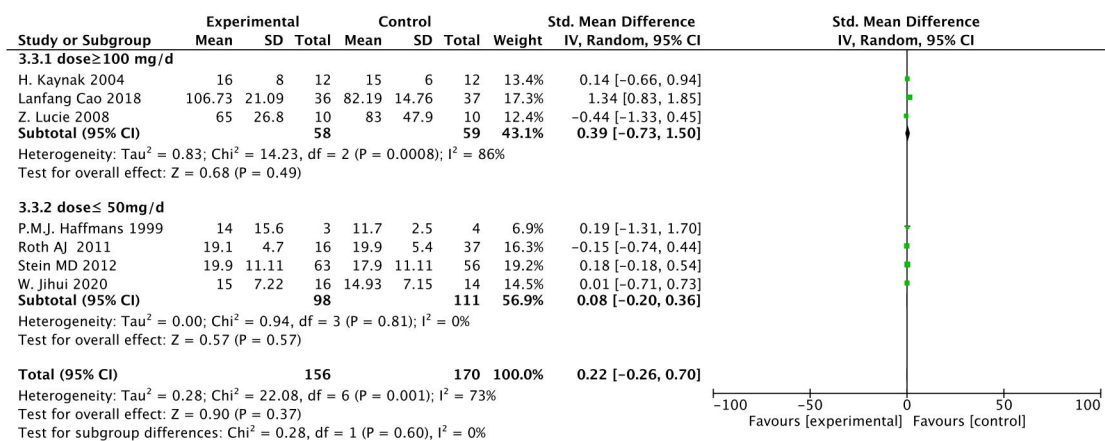



Fig. 28 subgroups analysis to REM (treatment combination or placebo)

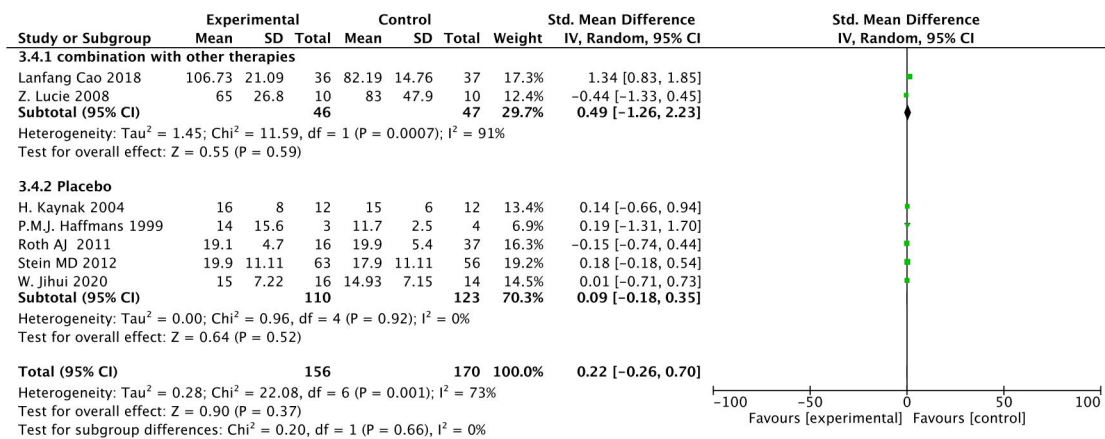

Fig. 29 Funnel plot for REM

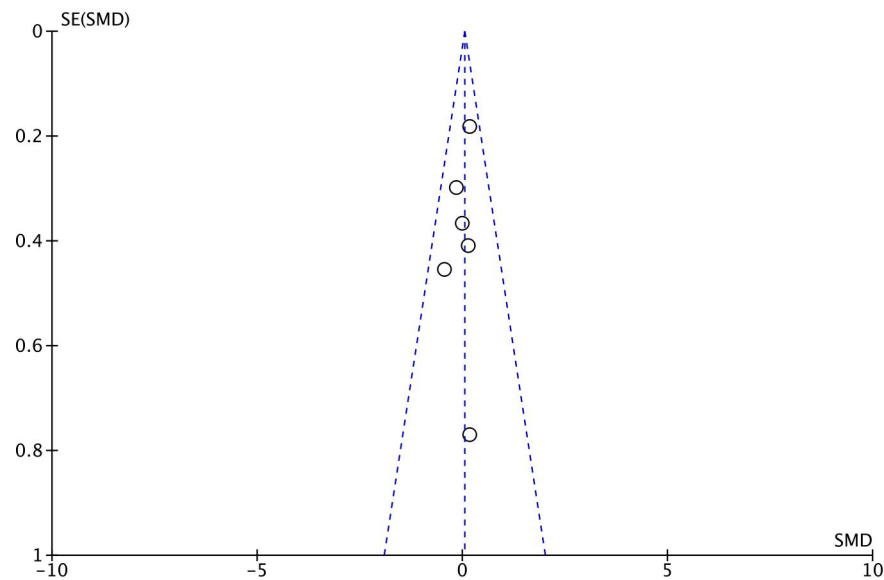

Fig. 30 pooled effects of trazodone on N1

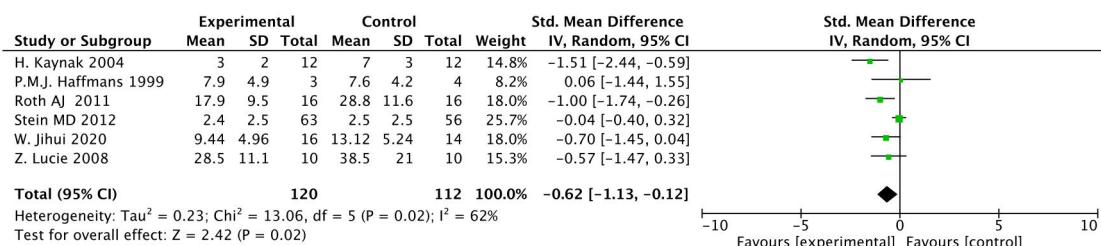

Fig. 31 Sensitivity analysis of heterogeneity to N1

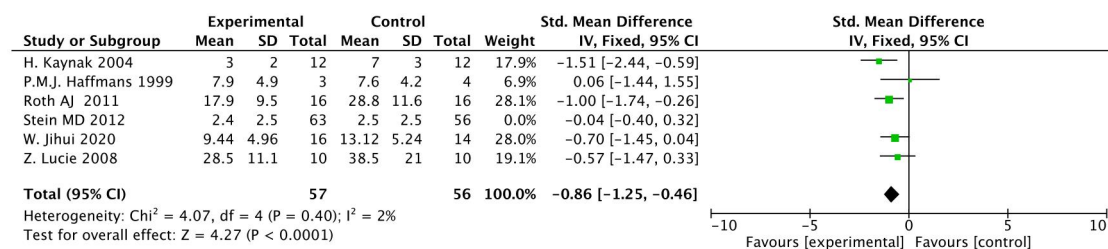

Fig. 32 Analysis on combination of treatment to N1

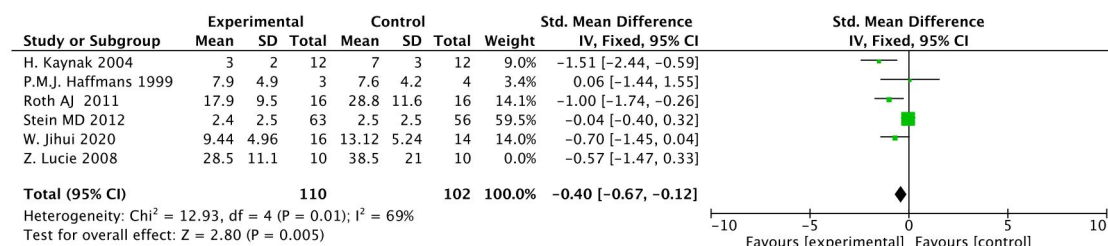

Fig. 33 subgroups analysis to N1 (treatment duration)

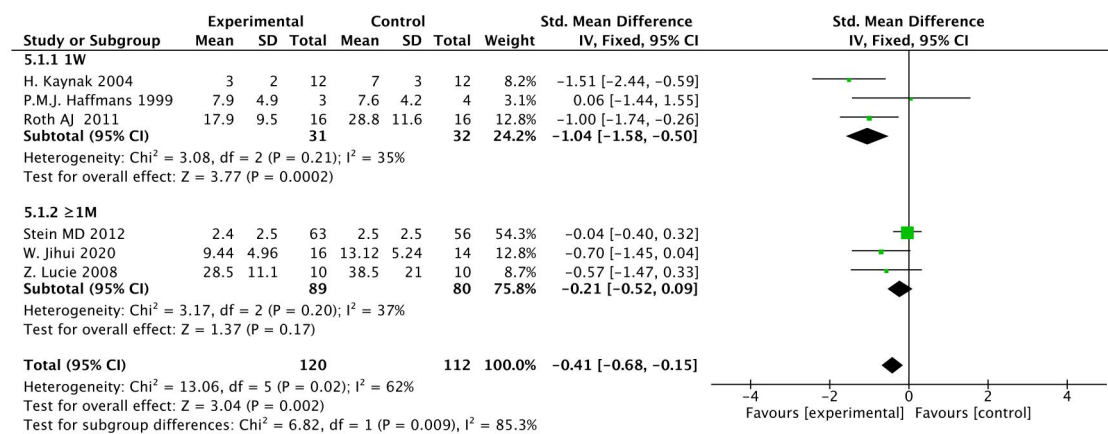

Fig. 34 subgroups analysis to N1(dosage)

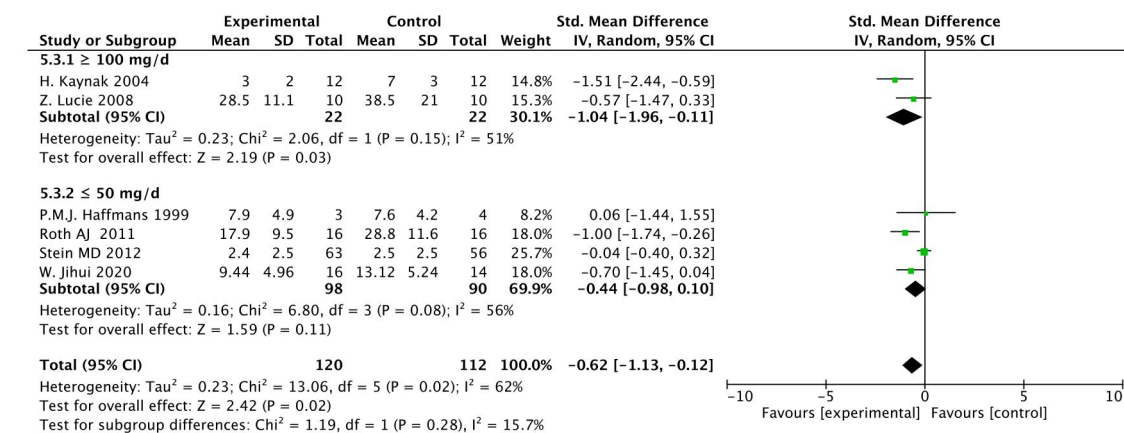

Fig. 35 Funnel plot for N1

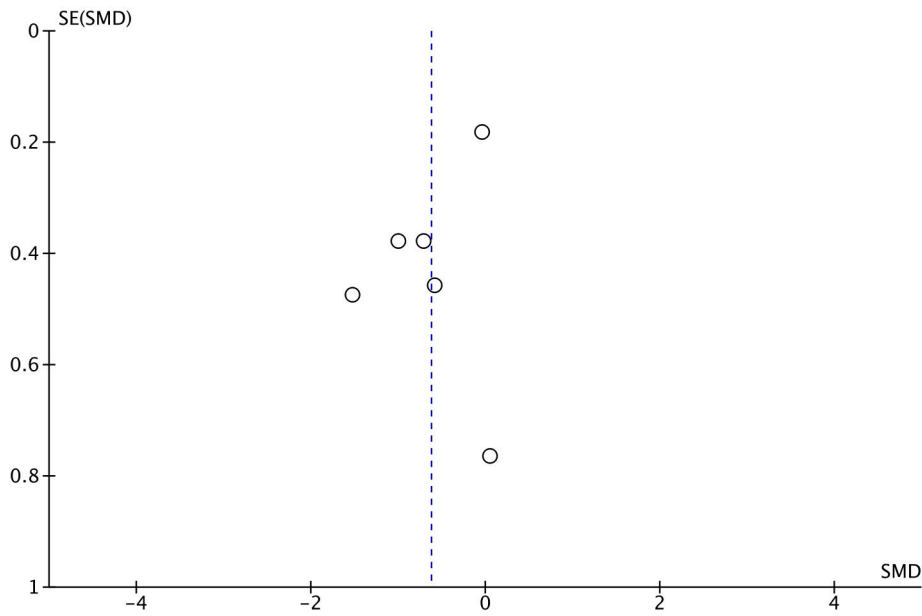

Fig. 36 pooled effects of trazodone on N2

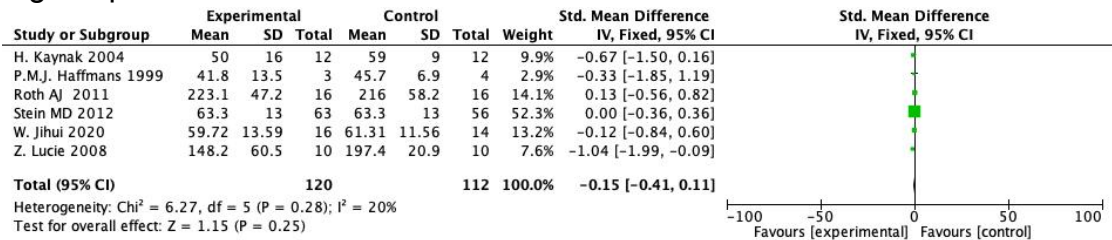

Fig. 37 Analysis on combination of treatment to N2

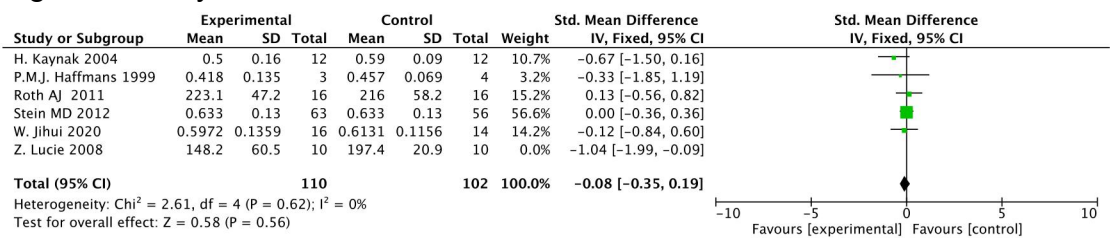

Fig. 38 subgroups analysis to N2 (treatment duration:1 week)

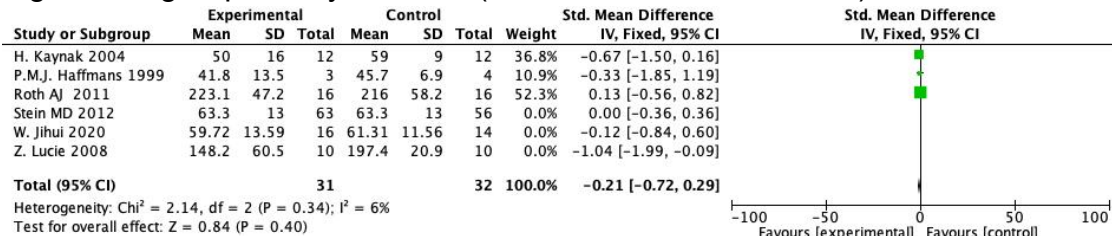

Fig. 39 subgroups analysis to N2 (treatment duration:  $\geq 1$  month)

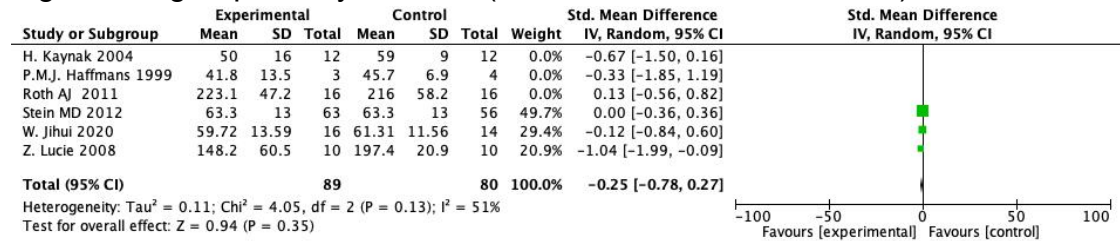

Fig. 40 subgroups analysis to N2(dosage)

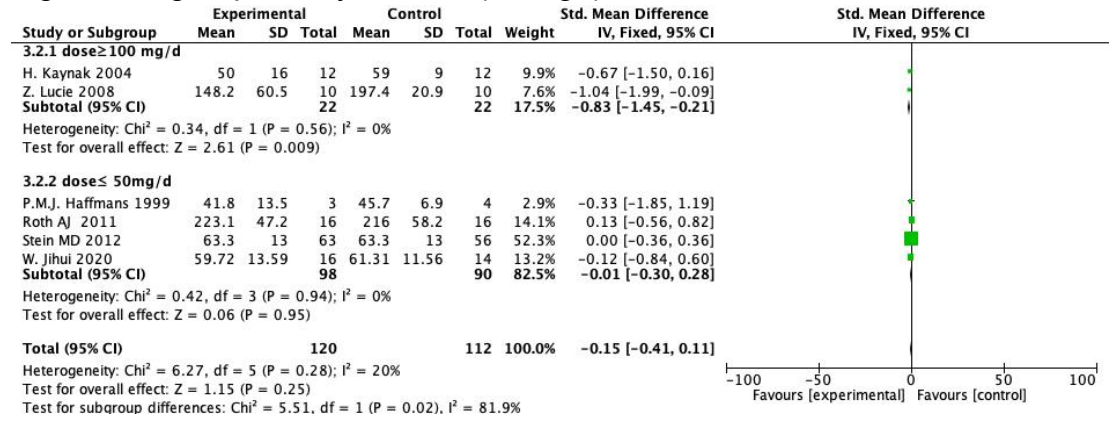

Fig. 41 Funnel plot for N2

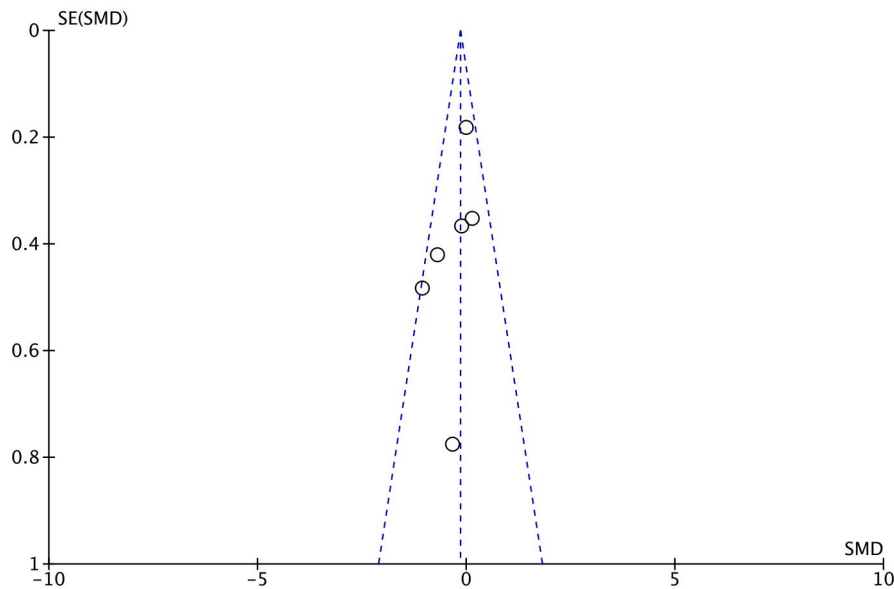

Fig. 42 pooled effects of trazodone on N3

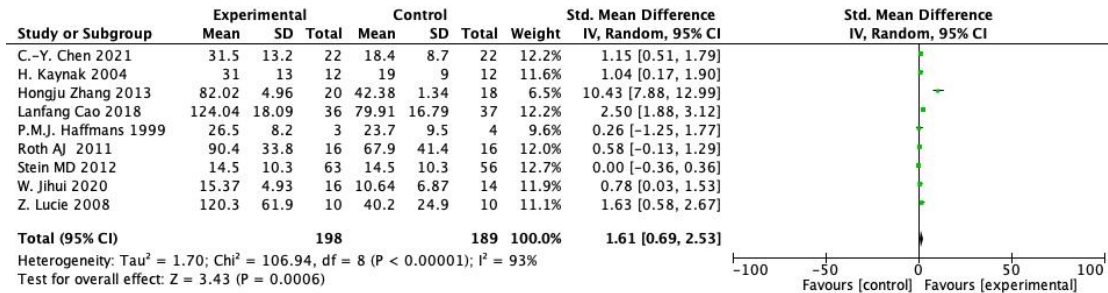

Fig. 43 subgroups analysis to N3 ( mean age)

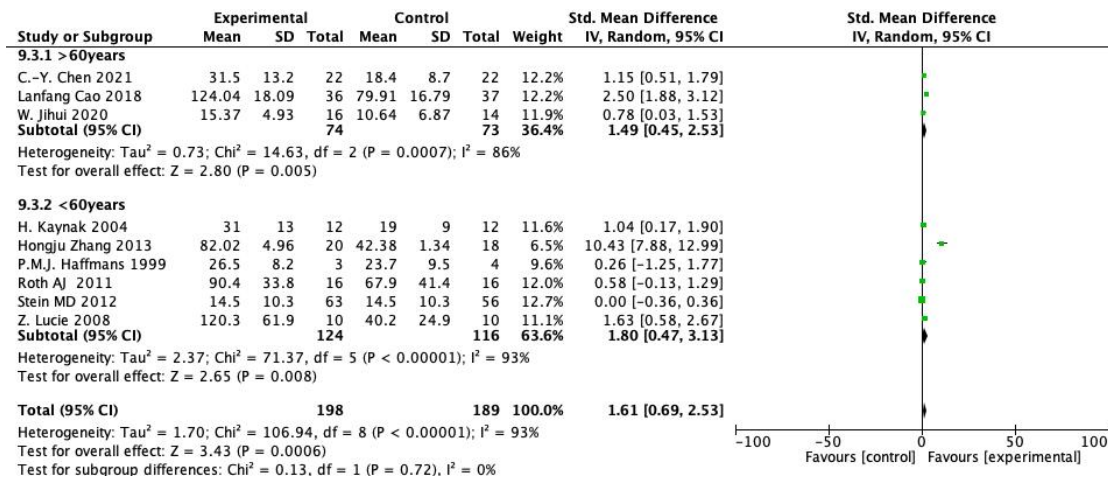

Fig. 44 subgroups analysis to N3(dosage)

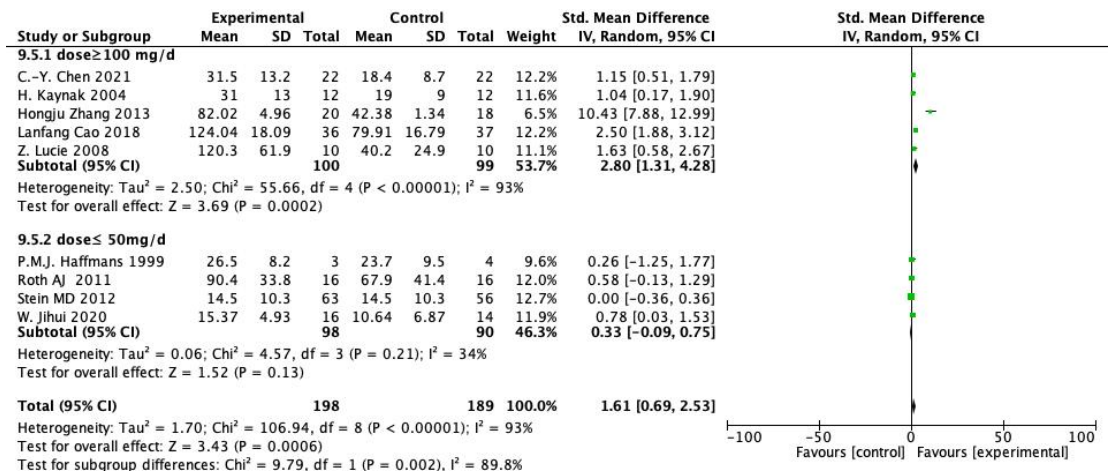

Fig. 45 subgroups analysis to N3 (treatment combination or placebo)

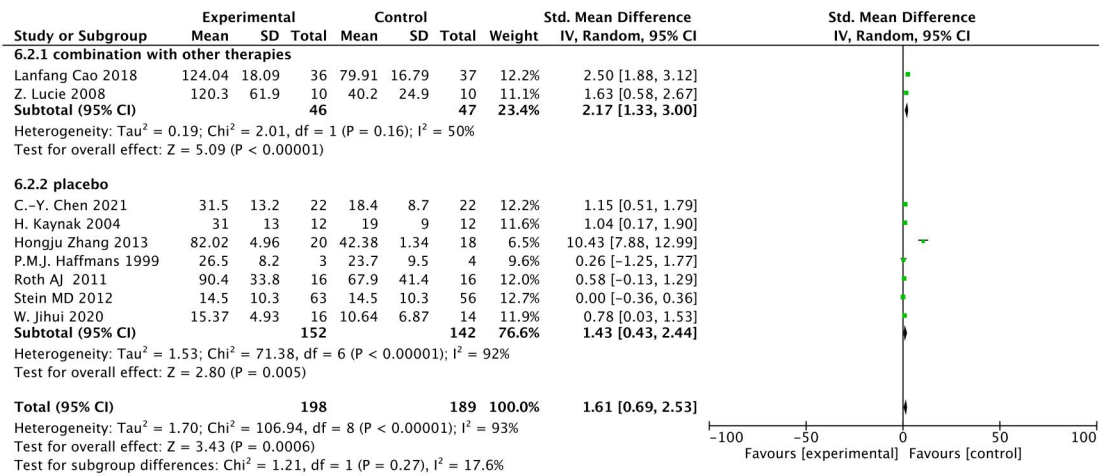

Fig. 46 subgroups analysis to N3 (treatment duration)

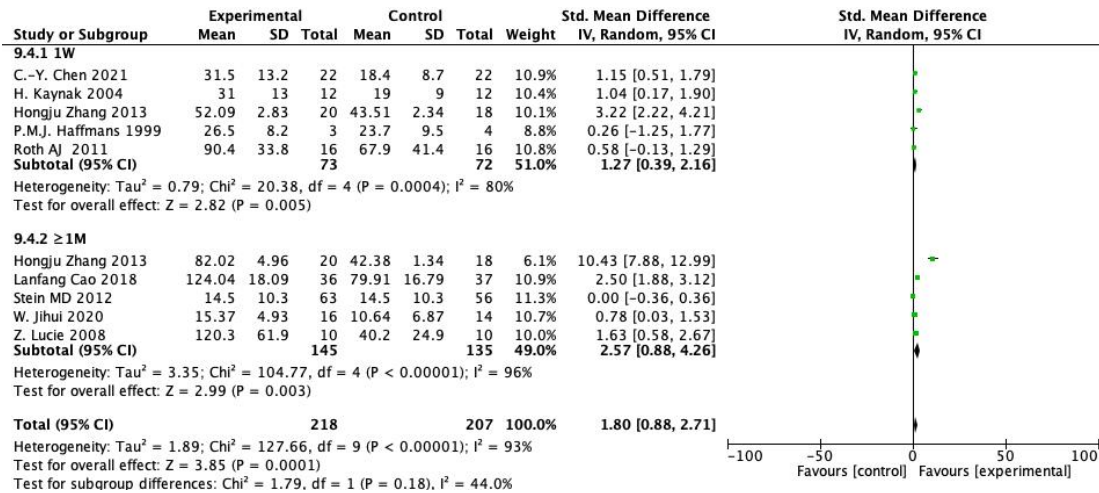

Fig. 47 Funnel plot for N3

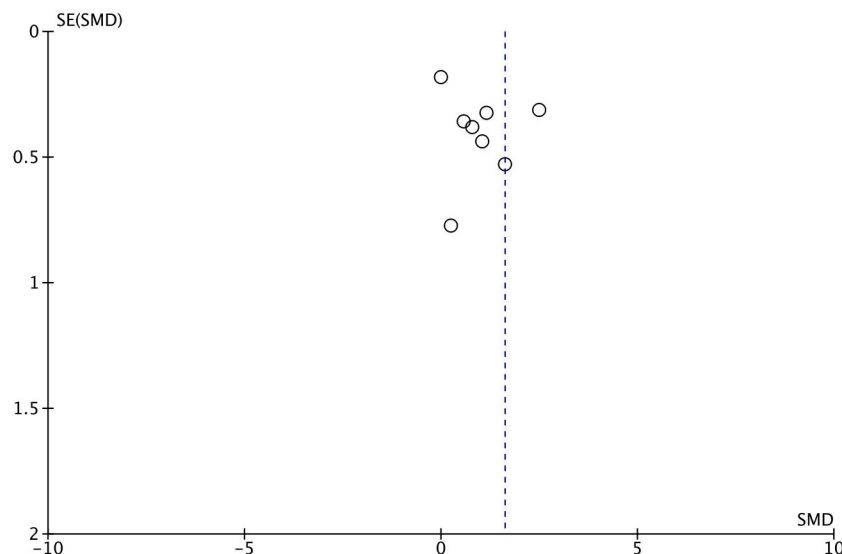

Fig. 48 discontinuation for all causes

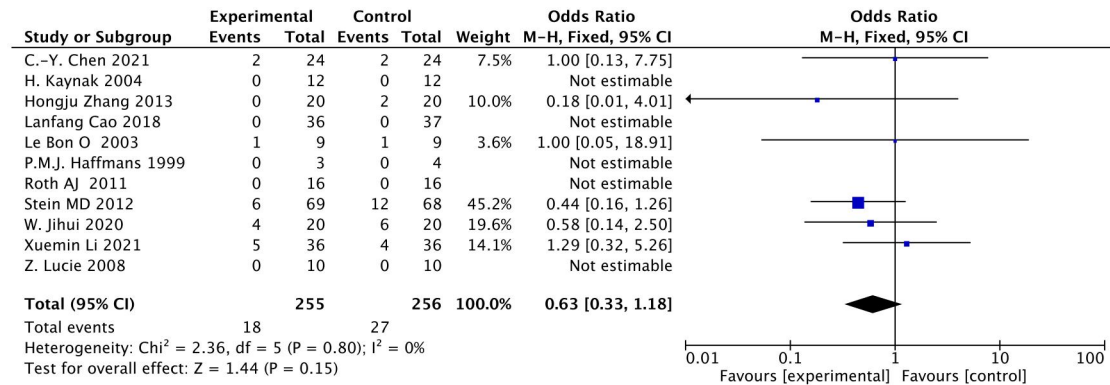

Fig. 49 Adverse event: dizziness

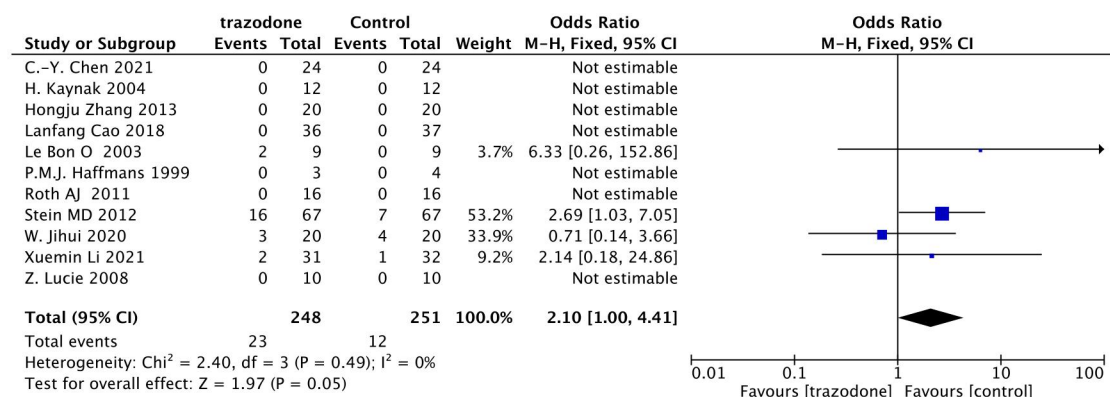

Fig. 50 Adverse event: headache

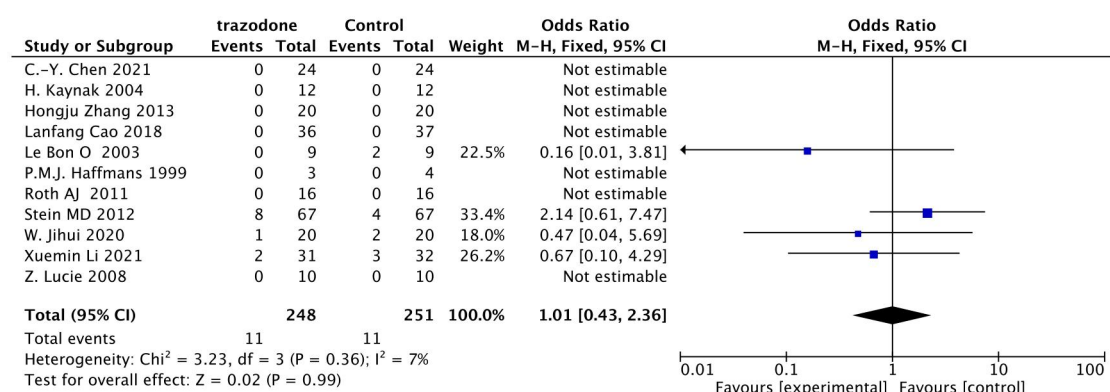

Fig. 51 Adverse event: daytime drowsiness

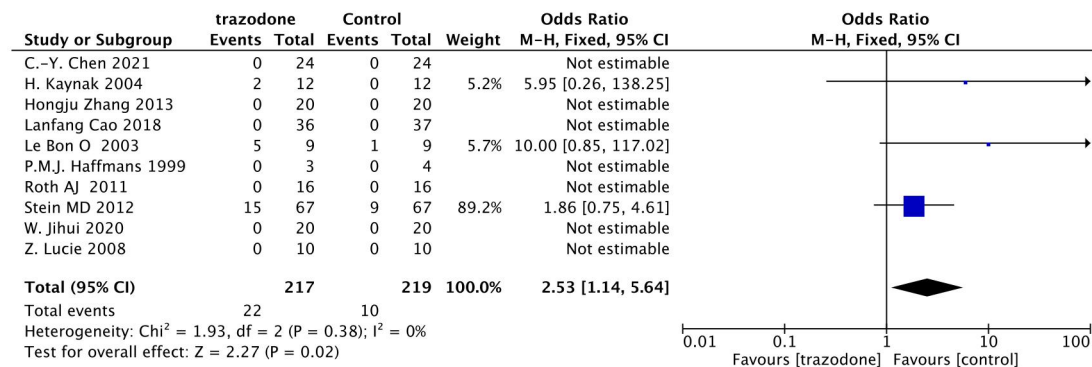

Fig. 52 Adverse event: decreased appetite

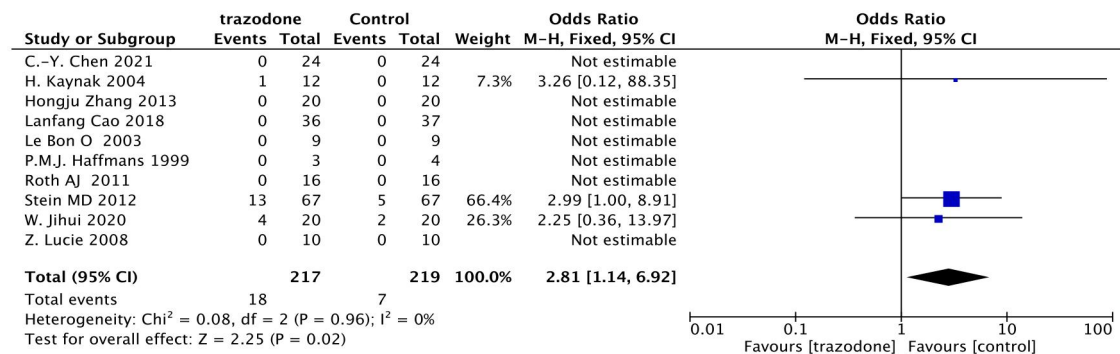

Article title: Trazodone Changed the Polysomnographic Sleep Architecture in Insomnia: A Systematic Review and Meta-Analysis

journal name: Drugs

author names: Yongliang Zheng<sup>1</sup> • Tian Lv<sup>2</sup> • Jingjing Wu<sup>3</sup> • Yumeng Lyu<sup>1</sup>

Affiliation:

<sup>1</sup> School of Rehabilitation Medicine, Jiangsu Vocational College of Medicine, Yancheng, China

<sup>2</sup> Department of Neurology, Zhuji Hospital Affiliated Shaoxing University, Shaoxing, China

<sup>3</sup> Department of Cardiology, Pudong New Area People's Hospital, Shanghai, China

The corresponding author and e-mail address:

Yongliang Zheng, 12131@jsmc.edu.cn
